# Supplementary material for: Regional genetic differences among Japanese populations and performance of genotype imputation using whole-genome reference panel of the Tohoku Medical Megabank Project
Source: PubMed Central journal article supplement (PMC6057088; doi:10.1186/s12864-018-4942-0), 2018-07-24

A: 94 Iwate and 6 Miyagi

C: 36 Nagahama and 6 Aki

B: 42 Iwate, 282 Miyagi and 3 Nagahama

D: 29 Aki

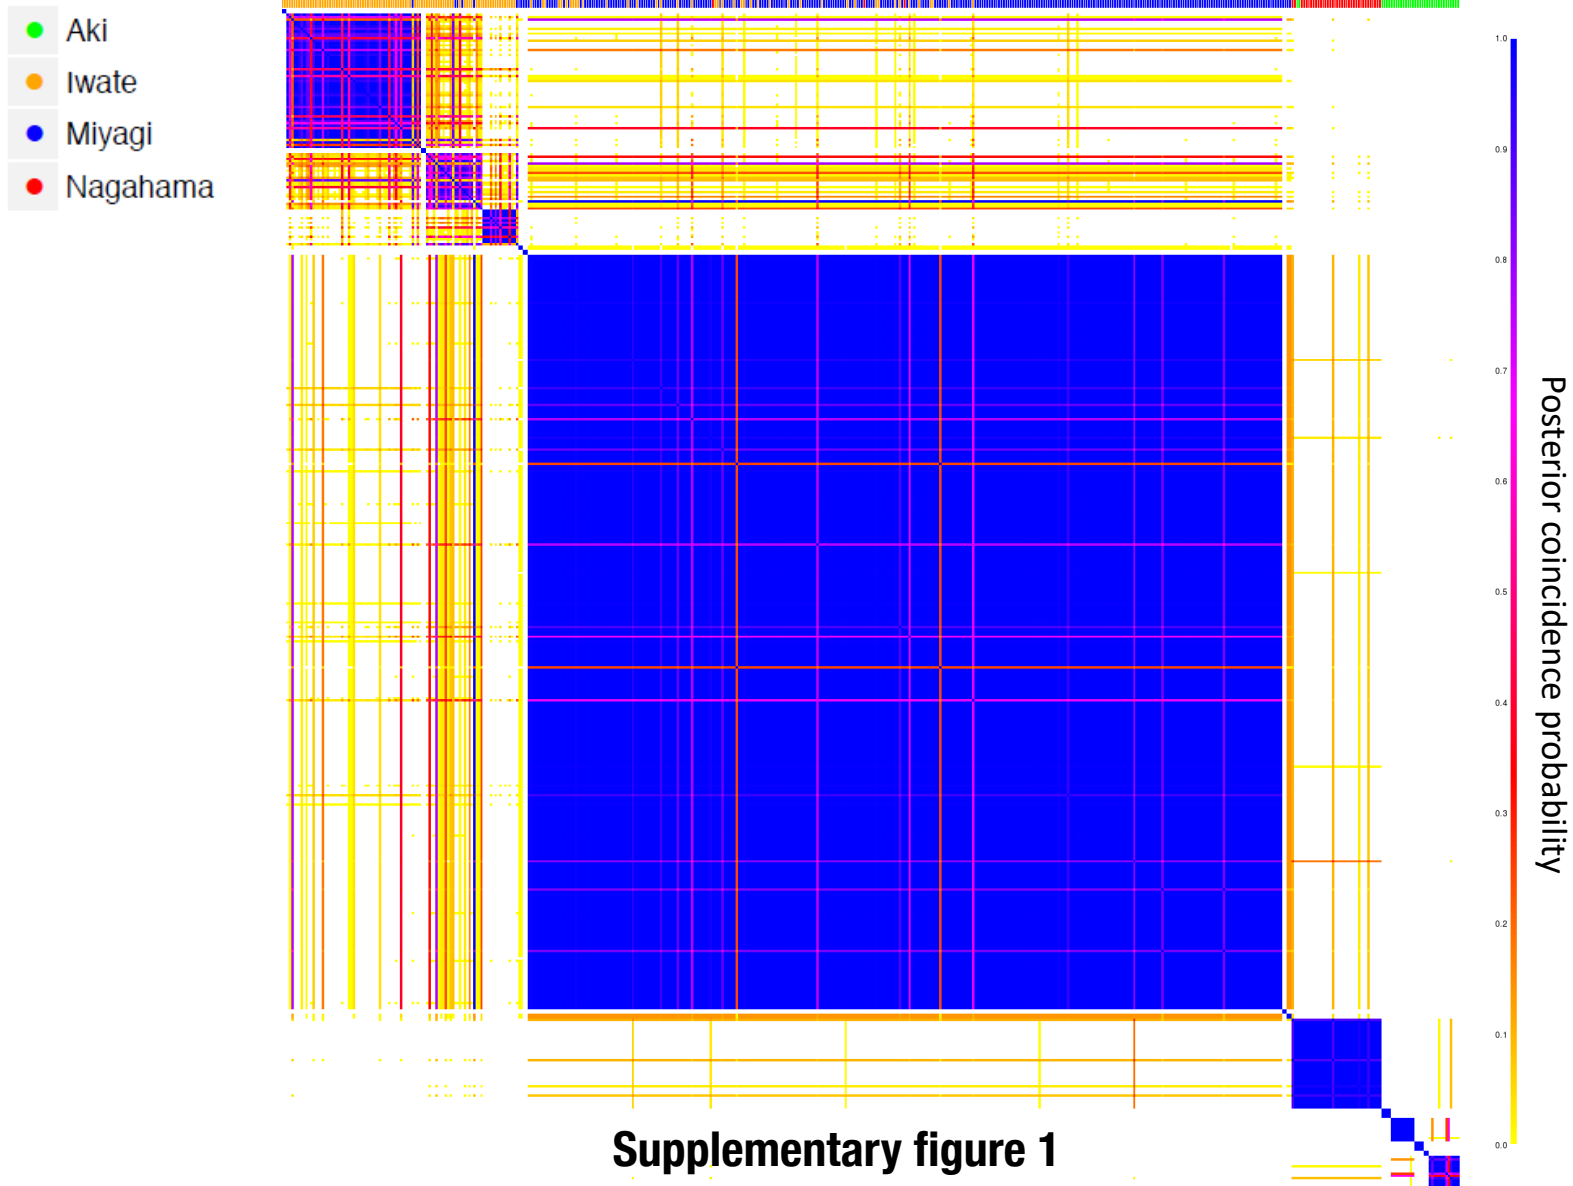

Supplement: 12864_2018_4942_MOESM2_ESM.pdf [file 12864_2018_4942_MOESM2_ESM.pdf]
